# Supplementary material for: Structures and energetics of electrosprayed uracilnCa2+clusters (n = 14–4) in the gas phase
Source: Royal Society of Chemistry journal article supplement (doi:10.1039/c1cp22984b), 2011-12-03
Supplement: c1cp22984b.pdf [file c1cp22984b.pdf]

Figure S1

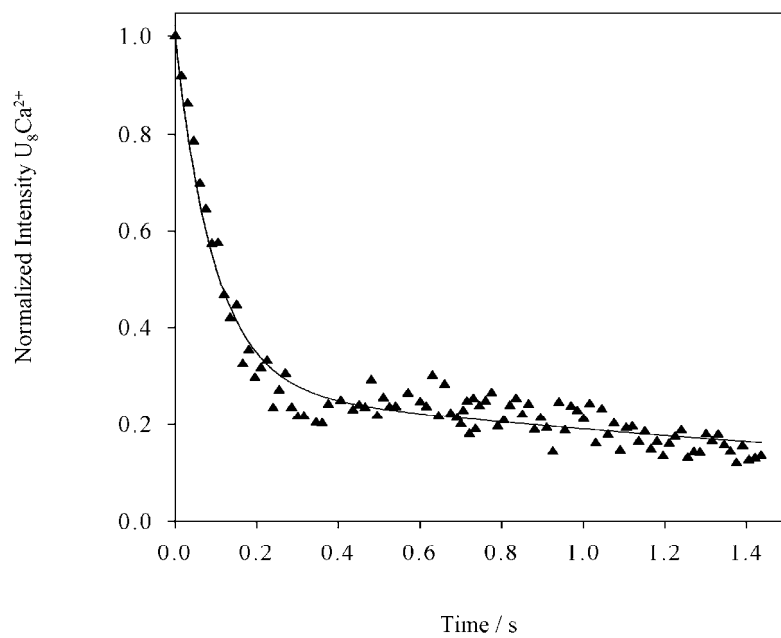

Figure S1. IRMPD kinetics for U<sub>8</sub>Ca<sup>2+</sup>.

Figure S2

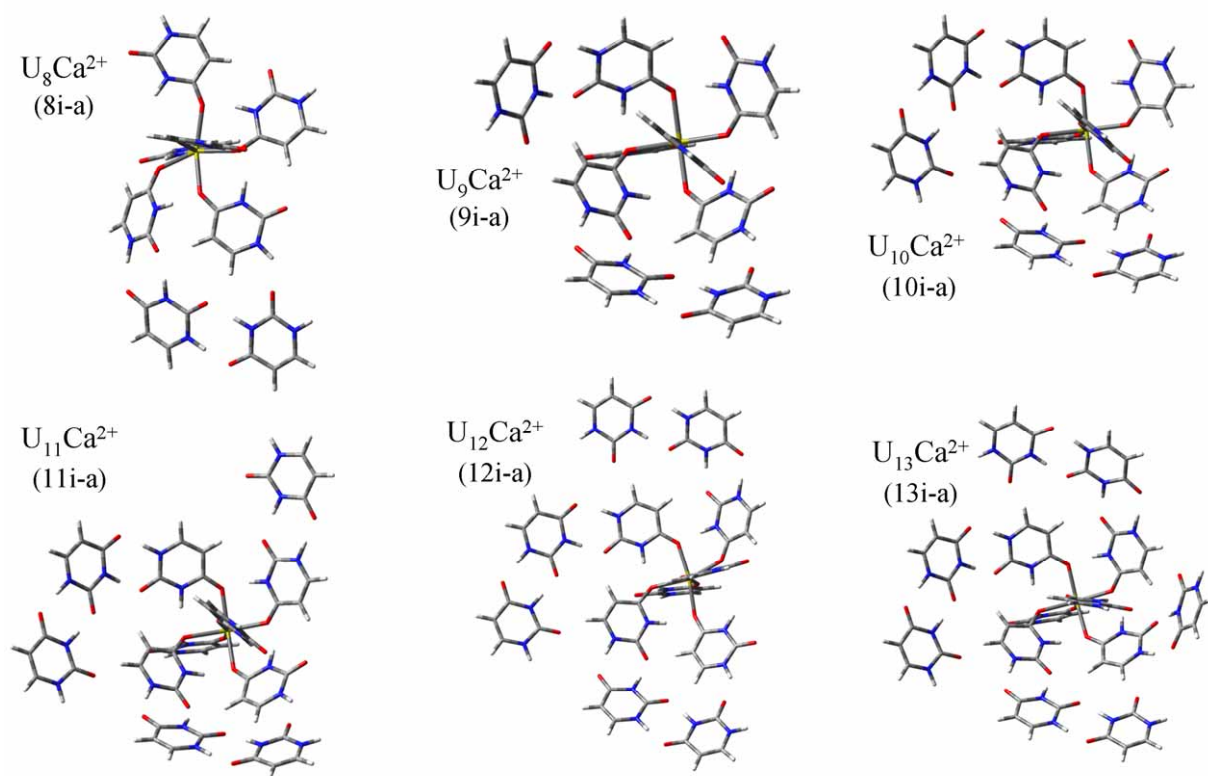

Figure S2. Proposed structures for  $U_nCa^{2+}$  with  $n = 8-13$ .

Figure S3

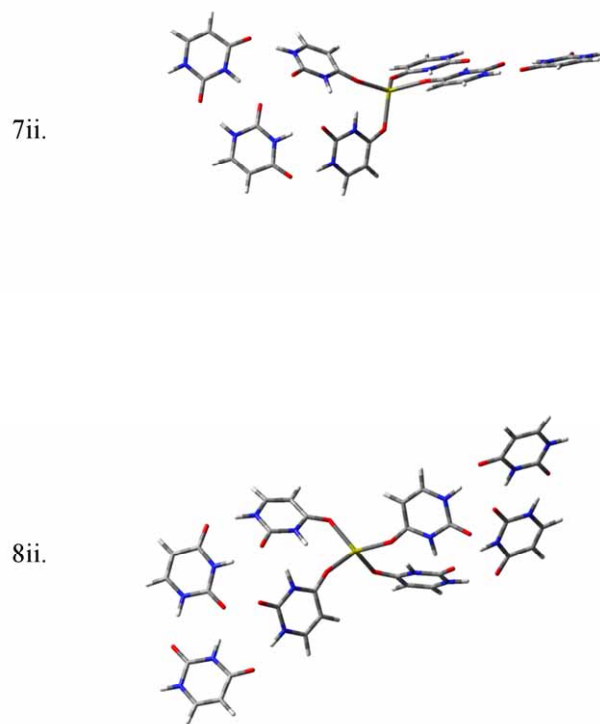

Figure S3. Proposed structures for  $U_nCa^{2+}$  with  $n = 7-8$  obtained by adding uracil molecules to the tetrahedral based inner core structure, 4ii.
